# Supplementary material for: Chiral salen Mn(iii) complexes immobilized onto crystalline aluminium oligo-styrenyl phosphonate-hydrogen phosphate (AlSPP) for heterogeneous asymmetric epoxidation
Source: Royal Society of Chemistry journal article supplement (doi:10.1039/c2cy20394d), 2012-09-15
Supplement: c2cy20394d.pdf [file c2cy20394d.pdf]

GC chromatograms of standard racemic epoxide sample ( $\alpha$ -methylstyrene oxide)

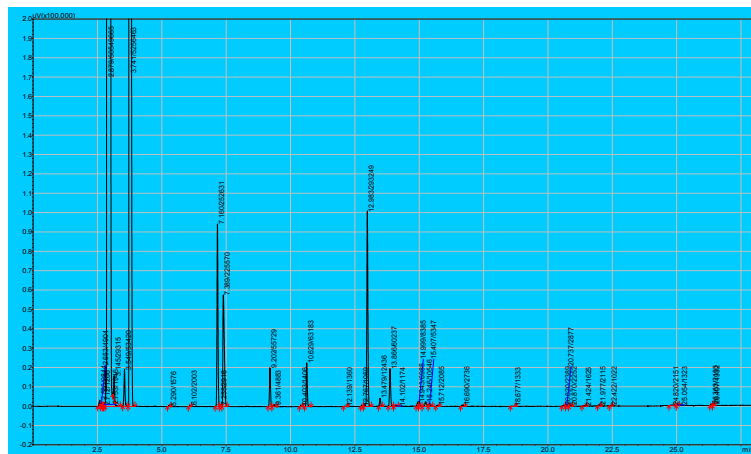

Entry 1 in Table 4
